# Supplementary material
Source: PubMed Central journal article supplement (PMC1425862)

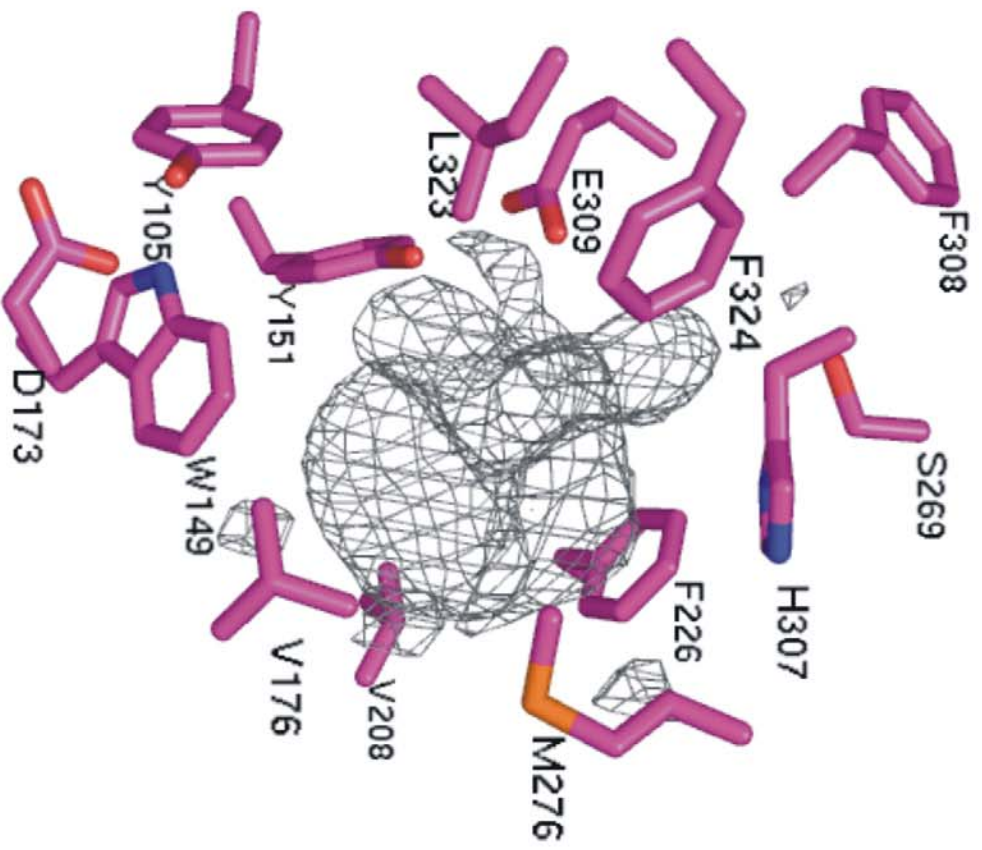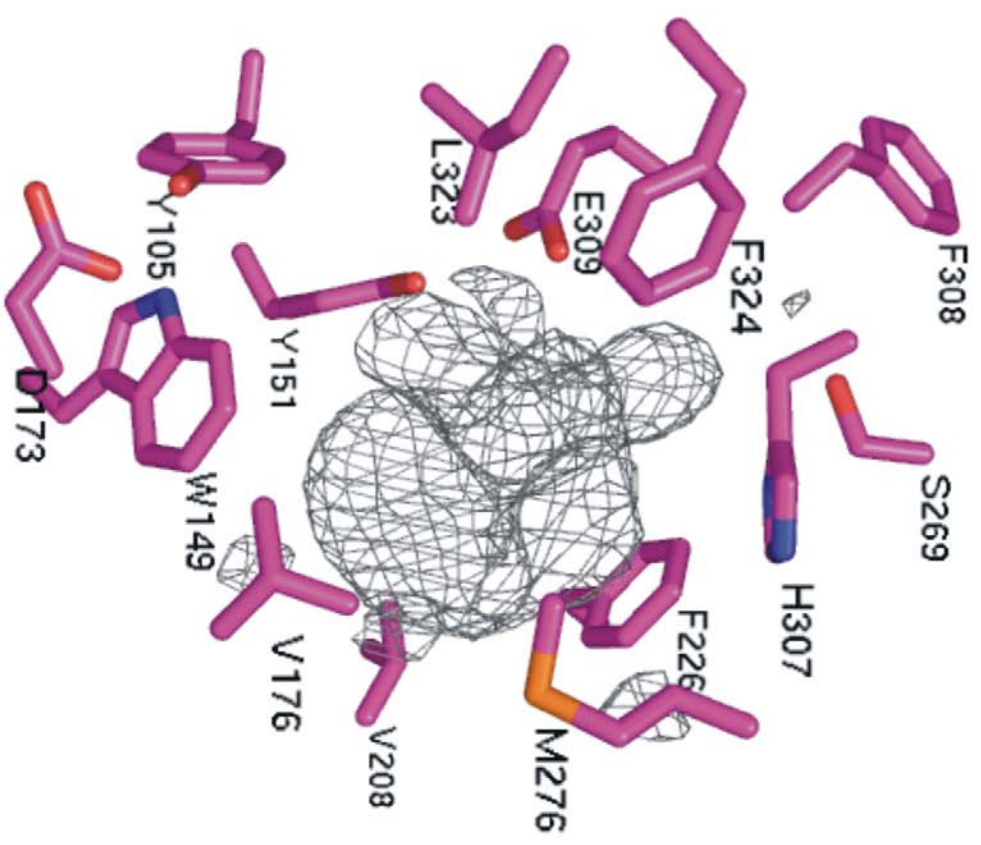

Supplement: plntcell_tpc.105.038018_1.pdf [file plntcell_tpc.105.038018_1.pdf]
